# Supplementary material
Source: PubMed Central journal article supplement (PMC11032234)
Supplement: NIHMS1959599-supplement-1.pdf [file NIHMS1959599-supplement-1.pdf]

### Supplementary Figure 1. Subgroup Analyses of Reintervention and Extended Length of Stay

1a. Subgroup Analysis of All In-hospital Reintervention

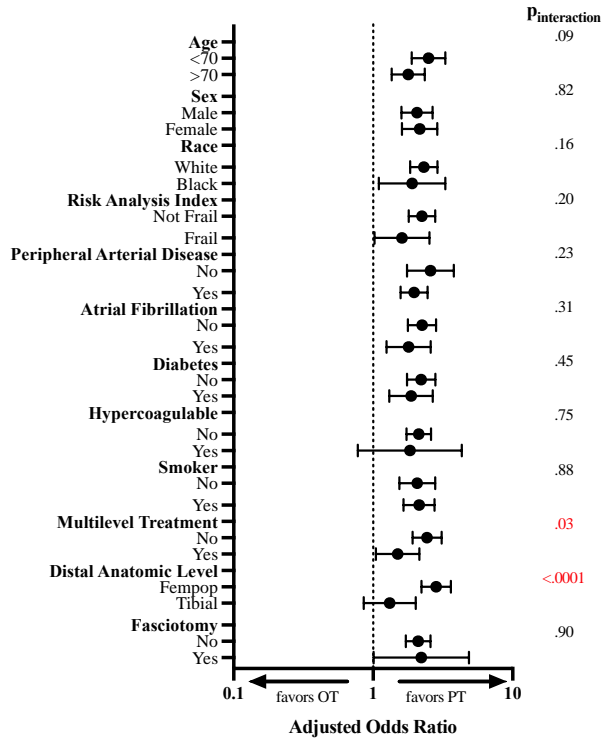

1b. Subgroup Analysis of Extended Length of Stay

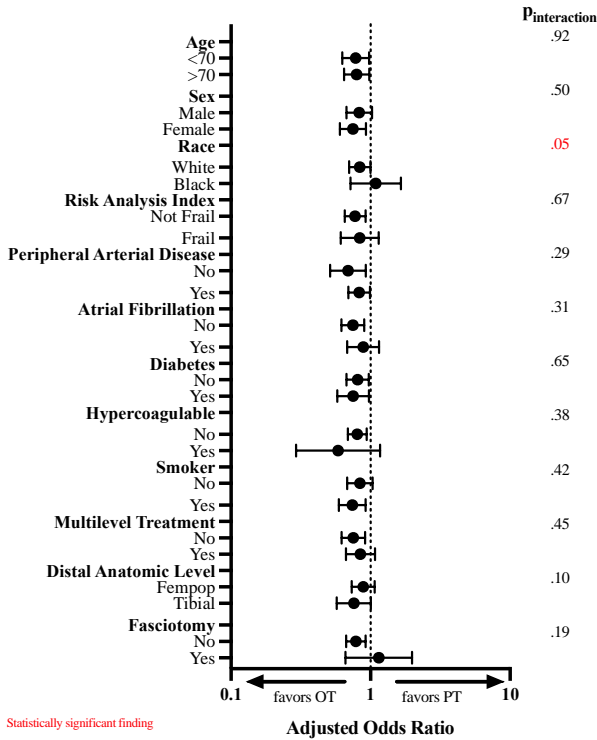

Statistically significant finding

Supplementary Table 1: ICD\* Codes

| Definition                                                               | Code(s)                                                                                                                                                                                                                                                                                                          |
|--------------------------------------------------------------------------|------------------------------------------------------------------------------------------------------------------------------------------------------------------------------------------------------------------------------------------------------------------------------------------------------------------|
| <b>Acute Limb Ischemia<sup>1,3</sup></b>                                 |                                                                                                                                                                                                                                                                                                                  |
| Arterial embolism and thrombosis of abdominal aorta                      | I7401, I7409                                                                                                                                                                                                                                                                                                     |
| Embolism and thrombosis of arteries of lower extremities                 | I743                                                                                                                                                                                                                                                                                                             |
| Embolism and thrombosis of arteries of extremities, unspecified          | I744                                                                                                                                                                                                                                                                                                             |
| Embolism and thrombosis of iliac artery                                  | I745                                                                                                                                                                                                                                                                                                             |
| <b>Surgical Thrombectomy<sup>1,3</sup></b>                               |                                                                                                                                                                                                                                                                                                                  |
| Extirpation of Matter from Abdominal Aorta, Open Approach                | 04C00ZZ                                                                                                                                                                                                                                                                                                          |
| Extirpation of Matter from Lower Extremity Artery, Open Approach         | 04CC0ZZ, 04CD0ZZ, 04C0HZZ, 04CJ0ZZ, 04CK0ZZ, 04CL0ZZ, 04CM0ZZ, 04CN0ZZ, 04CP0ZZ, 04CQ0ZZ, 04CR0ZZ, 04CS0ZZ, 04CT0ZZ, 04CU0ZZ, 04CV0ZZ, 04CW0ZZ, 04CY0ZZ                                                                                                                                                          |
| <b>Percutaneous Thrombectomy<sup>1,3</sup></b>                           |                                                                                                                                                                                                                                                                                                                  |
| Extirpation of Matter from Aorta, Percutaneous Approach                  | 04C03ZZ, 04C04ZZ                                                                                                                                                                                                                                                                                                 |
| Extirpation of Matter from Lower Extremity Artery, Percutaneous Approach | 04CC3ZZ, 04CC4ZZ, 04CD3ZZ, 04CD4ZZ, 04CH3ZZ, 04CH4ZZ, 04CJ3ZZ, 04CJ4ZZ, 04CK3ZZ, 04CK4ZZ, 04CL3ZZ, 04CL4ZZ, 04CM3ZZ, 04CM4ZZ, 04CN3ZZ, 04CN4ZZ, 04CP3ZZ, 04CP4ZZ, 04CQ3ZZ, 04CQ4ZZ, 04CR3ZZ, 04CR4ZZ, 04CS3ZZ, 04CS4ZZ, 04CT3ZZ, 04CT4ZZ, 04CU3ZZ, 04CU4ZZ, 04CV3ZZ, 04CV4ZZ, 04CW3ZZ, 04CW4ZZ, 04CY3ZZ, 04CY4ZZ |
| <b>Dissection<sup>25</sup></b>                                           |                                                                                                                                                                                                                                                                                                                  |
| Aortic Dissection                                                        | I7100, I71010, I71012, I71019, I7102, I7103                                                                                                                                                                                                                                                                      |
| Lower Extremity Dissection                                               | I7772, I7777                                                                                                                                                                                                                                                                                                     |
| <b>Trauma<sup>24</sup></b>                                               |                                                                                                                                                                                                                                                                                                                  |

|                                                             |                                                                                                                                                                                                                                                                                                                                                                                                                                                                                                                                                                                                                                                                        |
|-------------------------------------------------------------|------------------------------------------------------------------------------------------------------------------------------------------------------------------------------------------------------------------------------------------------------------------------------------------------------------------------------------------------------------------------------------------------------------------------------------------------------------------------------------------------------------------------------------------------------------------------------------------------------------------------------------------------------------------------|
| Injury to blood vessel                                      | 9049, 9029, 90287, 90289, 9010, 9020, 9046, 9035, 9982, 9048, 9047, 9047, 9041, 9040, 90250, 90253, 90259, 9048, 9046, 90440, 90441, 90450, 90451, 90453                                                                                                                                                                                                                                                                                                                                                                                                                                                                                                               |
| Complications of trauma/injury                              | 9086, 9089, 9588                                                                                                                                                                                                                                                                                                                                                                                                                                                                                                                                                                                                                                                       |
| Traumatic compartment syndrome of lower extremity           | 95892                                                                                                                                                                                                                                                                                                                                                                                                                                                                                                                                                                                                                                                                  |
| Injury to blood vessel                                      | S75011A, S75012A, S75019A, S75021A, S75022A, S75029A, S75811A, S75812A, S75819A, S75911A, S75912A, S75919A, S75801A, S75802A, S75809A, S75891A, S75892A, S75899A, S75901A, S75902A, S75909A, S75991A, S75992A, S75999A, S85011A, S85012A, S85019A, S85001A, S85002A, S85009A, S85091A, S85092A, S85099A, S85111A, S85112A, S85119A, S85101A, S85102A, S85109A, S85121A, S85122A, S85129A, S85141A, S85142A, S85149A, S85131A, S85132A, S85139A, S85151A, S85152A, S85159A, S85161A, S85162A, S85169A, S85181A, S85182A, S85189A, S85211A, S85212A, S85219A, S85201A, S85202A, S85209A, S85291A, S85292A, S85299A, S82101A, S82102A, S82109A, S82191A, S82192A, S82199A |
| Complications of trauma/injury                              | T799XXS, T798XXA                                                                                                                                                                                                                                                                                                                                                                                                                                                                                                                                                                                                                                                       |
| Traumatic compartment syndrome of lower extremity           | T79A21A, T79A21D, T79A21S, T79A22A, T79A22D, T79A22S, T79A29A, T79A29D, T79A29S                                                                                                                                                                                                                                                                                                                                                                                                                                                                                                                                                                                        |
| Unspecified lower extremity injury                          | S79811A, S79812A, S79819A, S79821A, S79822A, S79829A, S79911A, S79912A, S79919A, S79921A, S79922A, S79929A, S8980XA, S8981XA, S8982XA, S8990XA, S8991XA, S8992XA, S99911A, S99912A, S99919A, S99921A, S99922A, S99929A                                                                                                                                                                                                                                                                                                                                                                                                                                                 |
| Sequela of unspecified injury of lower extremity            | S3993XS, S79919S, S79929S, S8990XS, S99919S, S99929S                                                                                                                                                                                                                                                                                                                                                                                                                                                                                                                                                                                                                   |
| <b>Concomittant Lysis<sup>1,3</sup></b>                     |                                                                                                                                                                                                                                                                                                                                                                                                                                                                                                                                                                                                                                                                        |
| Introduction of Other Thrombolytic into Peripheral Artery** | 3E05017, 3E05317                                                                                                                                                                                                                                                                                                                                                                                                                                                                                                                                                                                                                                                       |

|                                                          |                                                                                                                                                                                                                                                                                                                                                                                                                                                                                                                                                                                                                                                                                                                                                                                                                                                                                                                                                                                                                                                                                                                                                                                                      |
|----------------------------------------------------------|------------------------------------------------------------------------------------------------------------------------------------------------------------------------------------------------------------------------------------------------------------------------------------------------------------------------------------------------------------------------------------------------------------------------------------------------------------------------------------------------------------------------------------------------------------------------------------------------------------------------------------------------------------------------------------------------------------------------------------------------------------------------------------------------------------------------------------------------------------------------------------------------------------------------------------------------------------------------------------------------------------------------------------------------------------------------------------------------------------------------------------------------------------------------------------------------------|
| Introduction of Other Thrombolytic into Central Artery** | 3E06017, 3E06317                                                                                                                                                                                                                                                                                                                                                                                                                                                                                                                                                                                                                                                                                                                                                                                                                                                                                                                                                                                                                                                                                                                                                                                     |
| <b>Bypass<sup>32</sup></b>                               |                                                                                                                                                                                                                                                                                                                                                                                                                                                                                                                                                                                                                                                                                                                                                                                                                                                                                                                                                                                                                                                                                                                                                                                                      |
| Suprainguinal bypass                                     | 0410096-0410099, 041009B-041009R, 04100A6-04100A9, 04100AB-04100AR, 04100J6-04100J9, 04100JB-04100JR, 04100K6-04100K9, 04100KB-04100KR, 04100Z6-04100Z9, 04100ZB-04100ZR, 041C096-041C099, 041C09B-041C09R, 041C0A6-041C0A9, 041C0AB-041C0AR, 041C0J6-041C0J9, 041C0JB-041C0JR, 041C0K6-041C0K9, 041C0KB-041C0KR, 041C0Z6-041C0Z9, 041C0ZB-041C0ZR, 041D096-041D099, 041D09B-041D09R, 041D0A6-041D0A9, 041D0AB-041D0AR, 041D0J6-041D0J9, 041D0JB-041D0JR, 041D0K6-041D0K9, 041D0KB-041D0KR, 041E099, 041E09B-041E09Q, 041E0A6-041E0A9, 041E0AB-041E0AQ, 041E0J6-041E0J9, 041E0JB-041E0JQ, 041E0K6-041E0K9, 041E0KB-041E0KQ, 041E0Z6-041E0Z9, 041E0ZB-041E0ZQ, 041F099, 041F09B-041F09Q, 041F0A6-041F0A9, 041F0AB-041F0AQ, 041F0J6-041F0J9, 041F0JB-041F0JQ, 041F0K6-041F0K9, 041F0KB-041F0KQ, 041F0Z6-041F0Z9, 041F0ZB-041F0ZQ, 041D0Z6-041D0Z9, 041D0ZB-041D0ZR, 041H099, 041H09B-041H09Q, 041H0A6-041H0A9, 041H0AB-041H0AQ, 041H0J6-041H0J9, 041H0JB-041H0JQ, 041H0K6-041H0K9, 041H0KB-041H0KQ, 041H0Z6-041H0Z9, 041H0ZB-041H0ZQ, 041J099, 041J09B-041J09Q, 041J0A6-041J0A9, 041J0AB-041J0AQ, 041J0J6-041J0J9, 041J0JB-041J0JQ, 041J0K6-041J0K9, 041J0KB-041J0KQ, 041J0Z6-041J0Z9, 041J0ZB-041J0ZQ |
| Infrainguinal bypass                                     | 041K-W                                                                                                                                                                                                                                                                                                                                                                                                                                                                                                                                                                                                                                                                                                                                                                                                                                                                                                                                                                                                                                                                                                                                                                                               |
| <b>Endovascular intervention<sup>32</sup></b>            |                                                                                                                                                                                                                                                                                                                                                                                                                                                                                                                                                                                                                                                                                                                                                                                                                                                                                                                                                                                                                                                                                                                                                                                                      |
| Suprainguinal endovascular intervention                  | 0470, 047B-J                                                                                                                                                                                                                                                                                                                                                                                                                                                                                                                                                                                                                                                                                                                                                                                                                                                                                                                                                                                                                                                                                                                                                                                         |
| Infrainguinal endovascular intervention                  | 047C-Y                                                                                                                                                                                                                                                                                                                                                                                                                                                                                                                                                                                                                                                                                                                                                                                                                                                                                                                                                                                                                                                                                                                                                                                               |
| <b>Other interventions</b>                               |                                                                                                                                                                                                                                                                                                                                                                                                                                                                                                                                                                                                                                                                                                                                                                                                                                                                                                                                                                                                                                                                                                                                                                                                      |

|                                                             |                                                                                                                                                                           |
|-------------------------------------------------------------|---------------------------------------------------------------------------------------------------------------------------------------------------------------------------|
| Fasciotomy <sup>3</sup>                                     | 0J8L0ZZ, 0J8M0ZZ, 0J8N0ZZ, 0J8P0ZZ, 0JDL0ZZ, 0JDM0ZZ, 0JDN0ZZ, 0JDP0ZZ, 0JNL0ZZ, 0JNM0ZZ, 0JNN0ZZ, 0JNP0ZZ, 0JBL0ZZ, 0JBM0ZZ, 0JBN0ZZ, 0JBPOZZ                            |
| Major amputation <sup>32</sup>                              | 0Y620ZZ, 0Y630ZZ, 0Y640ZZ, 0Y670ZZ, 0Y680ZZ, 0Y6C0Z1, 0Y6C0Z2, 0Y6C0Z3, 0Y6D0Z1, 0Y6D0Z2, 0Y6D0Z3, 0Y6F0ZZ, 0Y6G0ZZ, 0Y6H0Z1, 0Y6H0Z2, 0Y6H0Z3, 0Y6J0Z1, 0Y6J0Z2, 0Y6J0Z3 |
| <b>Non-Elixhauser Covariates</b>                            |                                                                                                                                                                           |
| Atrial fibrillation/ flutter <sup>28</sup>                  | I48                                                                                                                                                                       |
| Hypercoagulable State <sup>29#</sup>                        | D685-7                                                                                                                                                                    |
| Smoking <sup>30</sup>                                       | F17, T65.2, Z87.891                                                                                                                                                       |
| <b>Non-Elixhauser Covariates for Sensitivity Analysis 5</b> |                                                                                                                                                                           |
| Popliteal aneurysm                                          | I72.4                                                                                                                                                                     |
| History of peripheral vascular intervention                 | Z95.82                                                                                                                                                                    |
| Stenosis/thrombosis of stent or prosthetic graft            | T82.856, T82.858, T82.868                                                                                                                                                 |
| Chronic anticoagulant use                                   | Z79.01                                                                                                                                                                    |
| Chronic antiplatelet use                                    | Z79.02                                                                                                                                                                    |
